# Supplementary material for: Whole transcriptome analysis resulted in the identification of Chinese sprangletop (Leptochloa chinensis) genes involved in cyhalofop-butyl tolerance
Source: PubMed Central journal article supplement (PMC8268407; doi:10.1186/s12864-021-07856-z), 2021-07-09

A

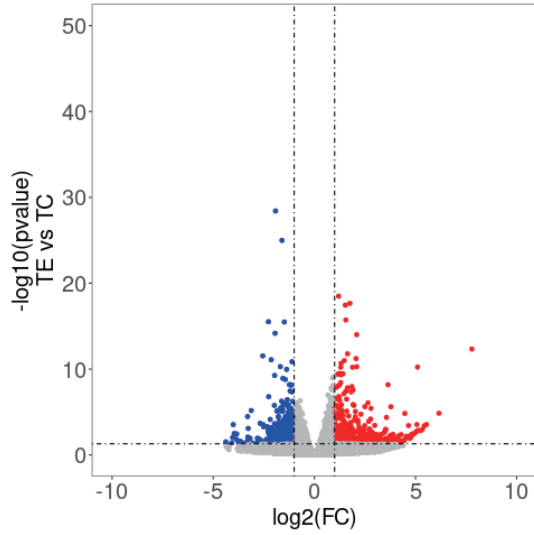

B

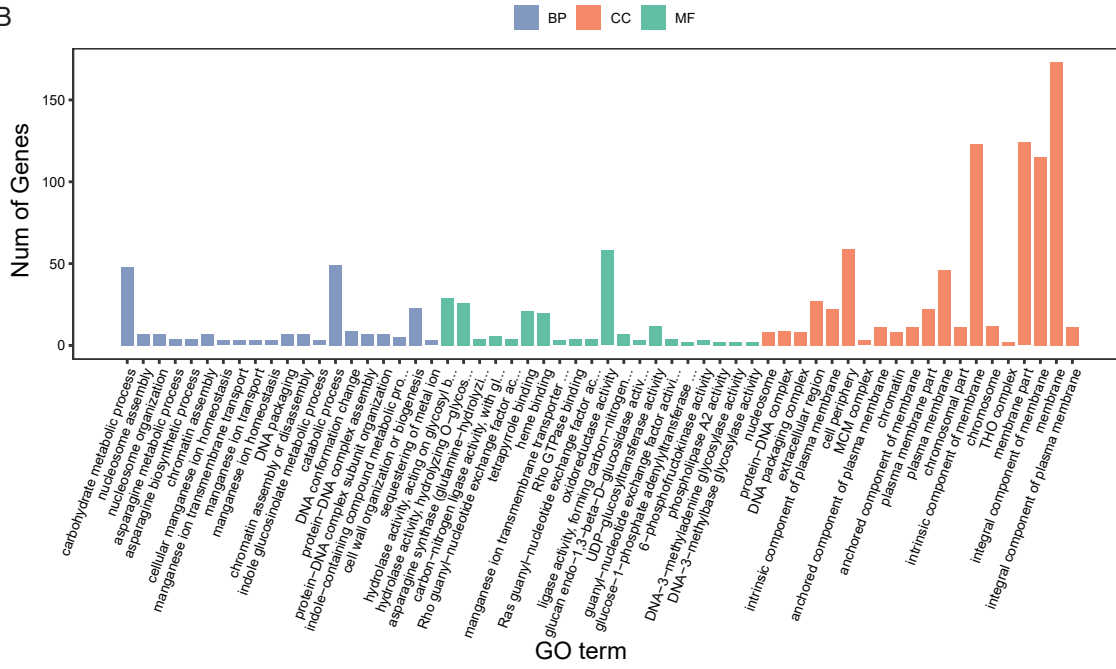

C

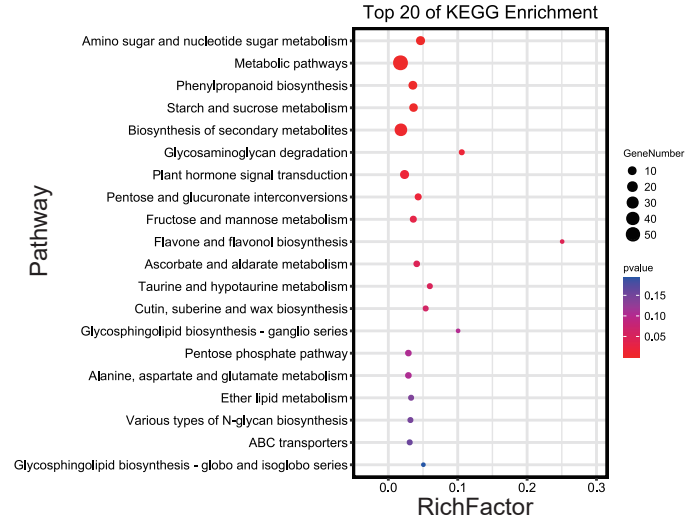

Supplement: 12864_2021_7856_MOESM8_ESM.pdf [file 12864_2021_7856_MOESM8_ESM.pdf]
