# Supplementary material for: Whole transcriptome analysis resulted in the identification of Chinese sprangletop (Leptochloa chinensis) genes involved in cyhalofop-butyl tolerance
Source: BMC Genomics. 2021 Jul 9;22:521. doi: 10.1186/s12864-021-07856-z (PMC8268407; doi:10.1186/s12864-021-07856-z)
Supplement: Supplementary file 7 — Additional file 7. A) The volcano plot of differentially expressed genes in SE versus SC. B) Gene ontology (GO) analysis of induced-DEGs in SE versus SC. The DEGs were summarized in biological process, cellular component and molecular function. C) KEGG annotation of induced-DEGs in SE versus SC. The Rich factor is the ratio of the number of DEGs annotated in a pathway term to the total number of genes in that pathway. [file 12864_2021_7856_MOESM7_ESM.pdf]

A volcano plot showing the results of a differential expression analysis between SE and SC. The x-axis represents the log2 fold change (log2(FC)) and the y-axis represents the negative logarithm of the p-value (-log10(pvalue)). The plot is divided into three regions by vertical dashed lines at log2(FC) = -1 and log2(FC) = 1. Genes with log2(FC) < -1 are colored blue, indicating downregulation in SE. Genes with log2(FC) > 1 are colored red, indicating upregulation in SE. Genes with log2(FC) between -1 and 1 are colored grey, indicating no significant change. The y-axis ranges from 0 to 60, and the x-axis ranges from -10 to 10. A horizontal dashed line is drawn at y = 1.3, representing the significance threshold (p = 0.05).

[illegible]

**Top 20 of KEGG Enrichment**

Pathway

RichFactor

GeneNumber

pvalue

| Pathway                                     | RichFactor (approx.) | GeneNumber | pvalue (approx.) |
|---------------------------------------------|----------------------|------------|------------------|
| Ribosome biogenesis in eukaryotes           | 0.08                 | 16         | 0.025            |
| Valine, leucine and isoleucine degradation  | 0.07                 | 12         | 0.025            |
| Glycosaminoglycan degradation               | 0.16                 | 4          | 0.025            |
| Cutin, suberine and wax biosynthesis        | 0.10                 | 8          | 0.025            |
| Arginine and proline metabolism             | 0.06                 | 8          | 0.025            |
| Alanine, aspartate and glutamate metabolism | 0.05                 | 8          | 0.025            |
| Limonene and pinene degradation             | 0.17                 | 4          | 0.025            |
| Plant hormone signal transduction           | 0.04                 | 12         | 0.025            |
| MAPK signaling pathway - plant              | 0.04                 | 12         | 0.025            |
| Taurine and hypotaurine metabolism          | 0.08                 | 8          | 0.025            |
| Fatty acid degradation                      | 0.05                 | 8          | 0.025            |
| Butanoate metabolism                        | 0.06                 | 8          | 0.025            |
| beta-Alanine metabolism                     | 0.05                 | 8          | 0.025            |
| Glucosinolate biosynthesis                  | 0.08                 | 8          | 0.025            |
| Non-homologous end-joining                  | 0.08                 | 8          | 0.025            |
| Glycerolipid metabolism                     | 0.04                 | 8          | 0.025            |
| Brassinosteroid biosynthesis                | 0.06                 | 8          | 0.025            |
| Homologous recombination                    | 0.04                 | 8          | 0.025            |
| Zeatin biosynthesis                         | 0.04                 | 8          | 0.025            |
| Thiamine metabolism                         | 0.04                 | 8          | 0.025            |
